# Supplementary material for: Time-resolved operando analysis of the pyrolysis of a PECVD-deposited siloxane polymer using a combined DRIFTS–MS system
Source: Royal Society of Chemistry journal article supplement (doi:10.1039/d3me00032j), 2023-01-01
Supplement: d3me00032j1.pdf [file d3me00032j1.pdf]

Supplementary Section

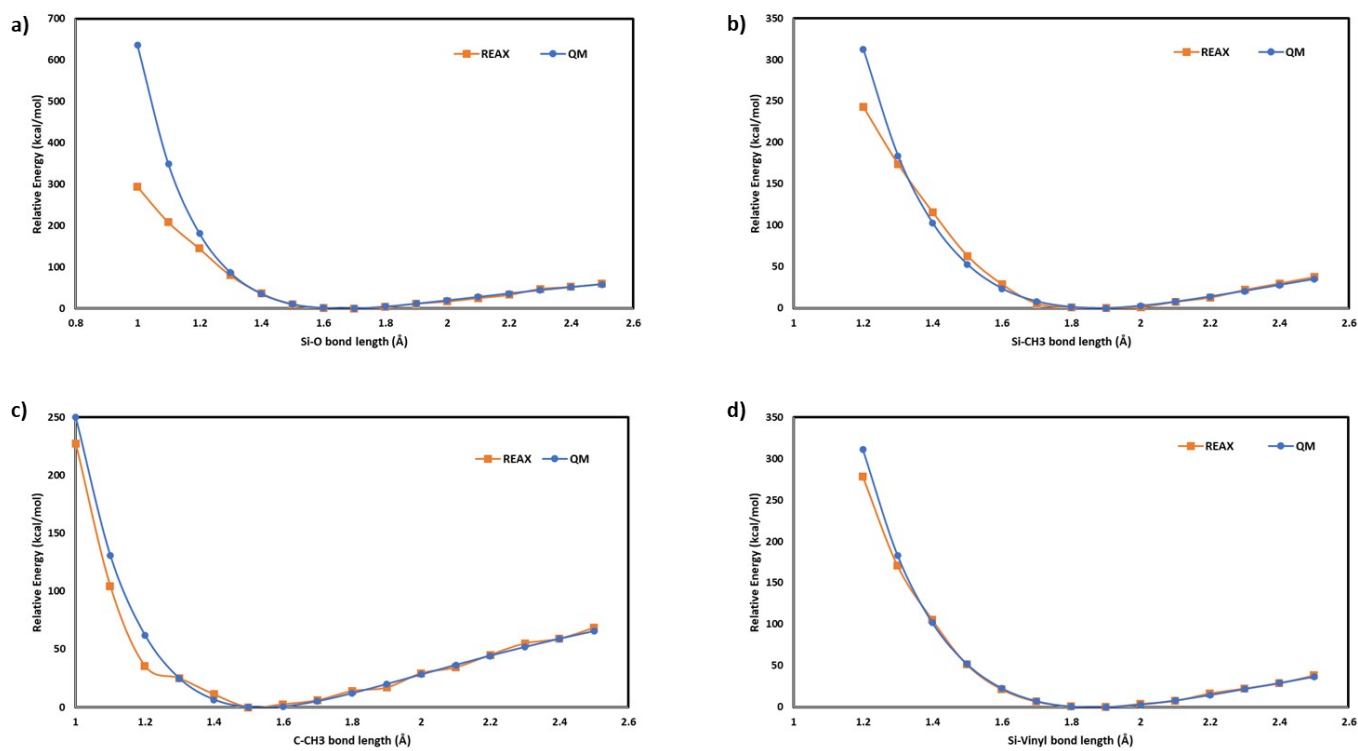

**Figure S1:** Comparison of the ReaxFF and DFT bond dissociation energies for the following bonds: a) Si-O, b) Si-CH<sub>3</sub>, c) C-CH<sub>3</sub>, and d) Si-Vinyl.

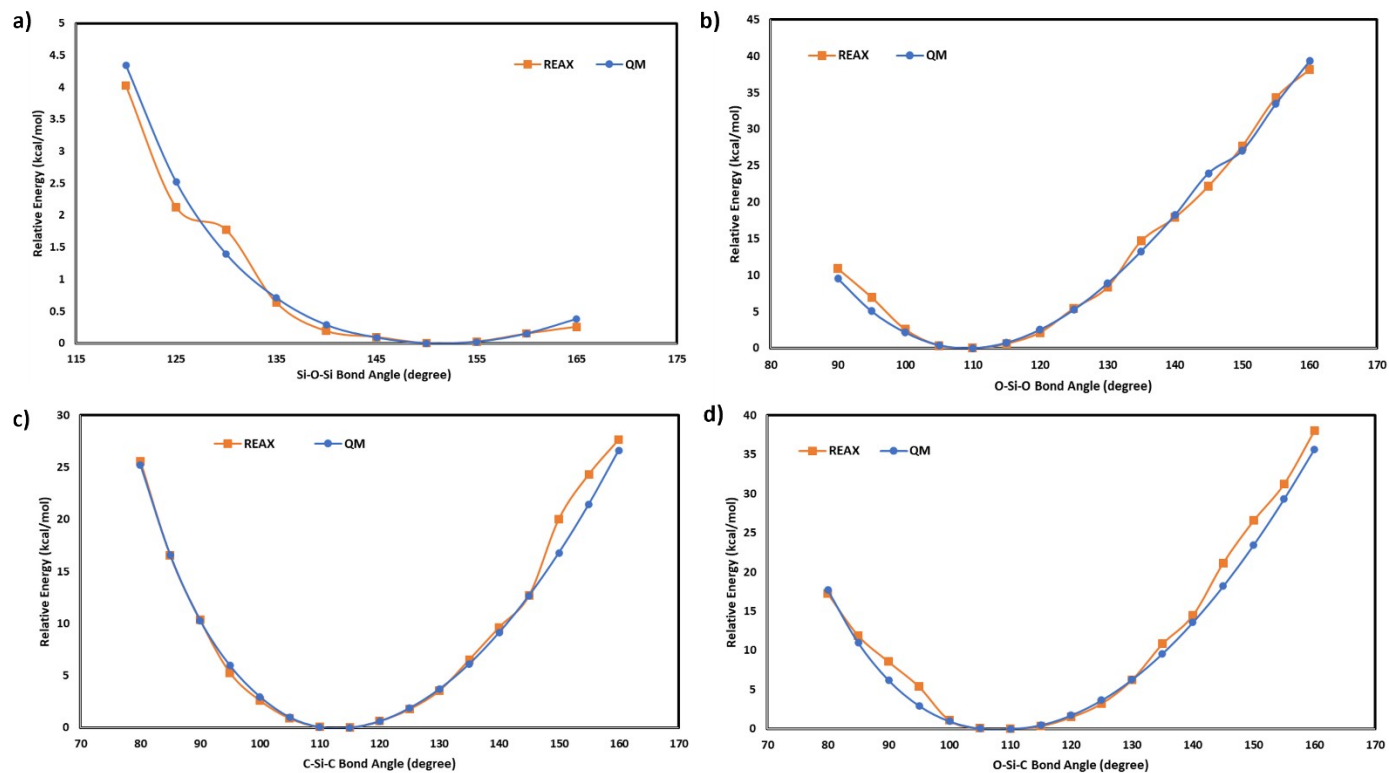

**Figure S2.** Comparison of the ReaxFF and DFT bond angle distortion energies for the following bonds: a) Si-O-Si, b) O-Si-O, c) C-Si-C, and d) O-Si-C.
